# Supplementary material for: Mutation Analysis of 2009 Pandemic Influenza A(H1N1) Viruses Collected in Japan during the Peak Phase of the Pandemic
Source: PLoS One. 2011 Apr 29;6(4):e18956. doi: 10.1371/journal.pone.0018956 (PMC3084724; doi:10.1371/journal.pone.0018956)
Supplement: Table S2 — Synonymous and non-synonymous mutations in the HA and NA regions analyzed in this study. Consensus sequence dereived from the first isolates collected in Japan (MC1) was used as a reference [17]. Major amino acid substitutions determining micro-clades, are highlighted in grey. (XLS) [file pone.0018956.s005.xls]

## Sheet: Sheet1
cluster	clade / unique strain		HA - amino acids region 121-406																													NA - amino acids region 133-318
			R130R	S145L	G148G	V149E	G172G	N173N	D185N	K188R	L191L	S200P	S202N	S207S	A214T	V216V	S220T	R222K	K228K	D239E	L250I	D291N	Q297Q	P314S	P321S	V338I	G352G	H369H	N387K	E391K		L158L	I163I	G210G	N222N	N248D	K254K	V264V	H275Y	V291V	D294D	R301R	Q313Q	C318C
>>> Samples in Japan <<<
cluster 1	MC10														T				K*				Q*			I
cluster 1	A/Kanagawa/140/2009(H1N1)
cluster 1	A/Narita/1/2009(H1N1)
cluster 1	A/Shizuoka-C/97/2009(H1N1)
cluster 1.2	MC1																												K**										Y**
cluster 1.3	MC11						G*						N																							D**								C*
cluster 1.3	A/Niigata/690/2009(H1N1)																																			D
cluster 1.3	A/Shiga/1/2009(H1N1)																																			D
cluster 1.3	A/Shizuoka/793/2009(H1N1)																																			D
cluster 1.3	A/Tokushima/1/2009(H1N1)																																			D
cluster 2	MC2																T			E																D
cluster 2	MC3																T																			D			Y**
cluster 2	MC4																T																			D	K*
cluster 2	MC5																T																			D
cluster 2	MC6													S*			T																			D
cluster 2	MC7																T			G																D
cluster 2	MC8																T																			D
cluster 2	MC9																T																			D
cluster 2	A/Fukushima/1/2009(H1N1)																T																			D
cluster 2	A/Gifu-C/67/2009(H1N1)							N*									T																			D
cluster 2	A/Hiroshima/200/2009(H1N1)																T					Y														D
cluster 2	A/Hiroshima/230/2009(H1N1)																T	K																	N*	D
cluster 2	A/Mie/41/2009(H1N1)																T																			D
cluster 2	A/Niigata/717/2009(H1N1)																T																			D
cluster 2	A/Niigata/749/2009(H1N1)																T																			D
cluster 2	A/Wakayama/57/2009(H1N1)																T																			D
cluster2	A/Hokkaido/256/2009(H1N1)														T		T																I*			D			Y
cluster2	A/Nagasaki/HA-58/2009(H1N1)																T								S											D			Y
>>> Samples from other countries <<<
cluster 2	A/Bogota/0466N/2009(H1N1)		R*														T																			D
cluster 2	A/Canada-ON/RV1589/2009(H1N1)																T																			D
cluster 2	A/Denmark/523/2009(H1N1)																T																			D
cluster 2	A/Fuzhou/01/2009(H1N1)																T																			D
cluster 2	A/Italy/85/2009(H1N1)																T																			D
cluster 2	A/New York/3007/2009(H1N1)																T																			D
cluster 2	A/New York/3166/2009(H1N1)																T																			D
cluster 2	A/New York/3193/2009(H1N1)																T																			D
cluster 2	A/New York/3237/2009(H1N1)																T																			D
cluster 2	A/New York/3463/2009(H1N1)																T																			D
cluster 2	A/New York/3468/2009(H1N1)																T																			D
cluster 2	A/New York/3502/2009(H1N1)												N				T																			D
cluster 2	A/New York/4290/2009(H1N1)																T																			D
cluster 2	A/New York/4790/2009(H1N1)																T																			D
cluster 2	A/Shanghai/37T/2009(H1N1)																T																			D
cluster 2	A/Shanghai/71T/2009(H1N1)																T
cluster 2	A/Taiwan/T0724/2009(H1N1)																T																			D
cluster 2	A/Taiwan/T1339/2009(H1N1)																T																			D
>>> Samples collected in this study <<<
Sample I (cluster 1 - 1.2)	MC10											P			T								Q*			I											Q**
Sample I (cluster 1 - 1.2)	others																												K**
Sample II (cluster 2)	MC2		R*/**														T			E				S**												D				V*
Sample II (cluster 2)	MC6		R*/**											S*			T								S**							L*/**		G*/**		D
Sample II (cluster 2)	MC13																T	K**				N					G*			K**						D
Sample II (cluster 2)	MC14			L**							L*/**						T													K						D			Y**
Sample II (cluster 2)	MC15																T	K**												K						D						R*
Sample II (cluster 2)	MC16					E			N**								T													K						D						R*
Sample II (cluster 2)	MC17									R					T		T																			D
Sample II (cluster 2)	MC18														T		T																			D		V*					Q*
Sample II (cluster 2)	MC19		R*/**												T		T																			D
Sample II (cluster 2)	MC20														T		T																I*			D
Sample II (cluster 2)	MC21							N*									T																			D
Sample II (cluster 2)	MC22				G											V*/**	T				I*/**							H*/**								D
Sample II (cluster 2)	MC23																T																			D
Sample II (cluster 2)	MC24																T																			D					D*
* Synonymous mutation
** Substitution not found in all isolates
Table S2 - Synonymous and non-synonymous mutations in the HA and NA regions analyzed in this study. Consensus sequence dereived from the first isolates collected in Japan (MC1) was used as a reference [17]. Major amino acid substitutions determining micro-clades, are highlighted in grey.
